# Supplementary material
Source: MDPI journal article supplement (https://www.mdpi.com/2073-4441/15/8/1627)

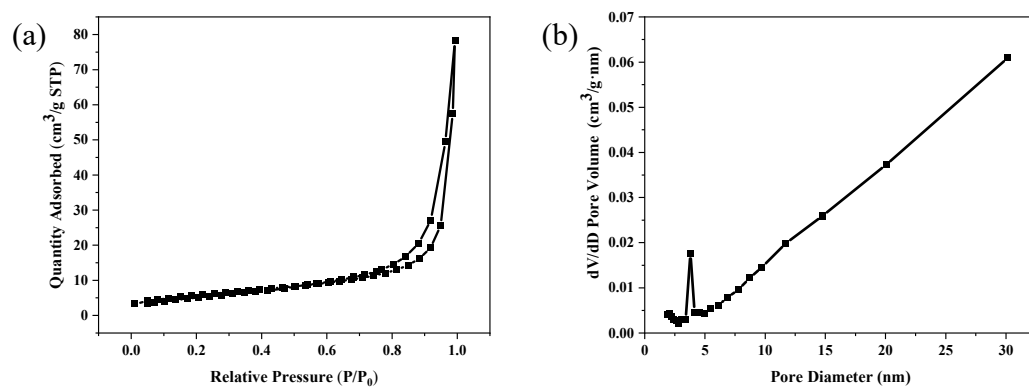

Figure S1. Nitrogen adsorption-desorption curve (a) and pore size distribution diagram (b) of LMO/CN-10.

Supplement: s1 [file s1]
